# Supplementary material
Source: publisher figshare collection journal article supplement (https://karger.figshare.com/articles/dataset/_/6269690)
Supplement: Supplementary file 1 [file 1]

## **Liebe Teilnehmerin, lieber Teilnehmer!**

Vielen Dank für Ihre Bereitschaft, an der Befragung teilzunehmen.

Ihre Teilnahme an dieser Studie hilft uns, die subjektive Beanspruchung von niedergelassenen Zahnärztinnen und Zahnärzten in ihrem Praxisalltag zu erfassen und Bereiche innerhalb des Berufsalltages zu identifizieren, die mit einer besonders starken Beanspruchung einhergehen. Auf den folgenden Seiten möchten wir Sie daher bitten, einige Fragen zur Häufigkeit des Auftretens verschiedener Gegebenheiten im Praxisalltag zu beantworten und die damit einhergehende Belastung einzuschätzen.

Es gibt keine richtigen oder falschen Antworten – jede Antwort ist dann zutreffend, wenn Sie Ihre persönliche Einschätzung widerspiegelt. Beantworten Sie jede Aussage möglichst ehrlich und gehen Sie bei der Beantwortung zügig vor.

Das Ausfüllen des Fragebogens wird ca. **10 Minuten** in Anspruch nehmen. Wenn Sie Fragen haben, wenden Sie sich gerne an M.Sc. Nora Buhrow (n.buhrow@tu-braunschweig.de).

## **Freiwilligkeit und Anonymität**

Die Teilnahme an dieser Befragung ist freiwillig. Ihre Daten werden streng vertraulich und anonym behandelt. Die Aufzeichnung und Auswertung der Daten erfolgt anonymisiert. Weiterhin unterliegen alle an dieser Untersuchung beteiligten Mitarbeiterinnen und Mitarbeiter der Abteilung für Klinische Psychologie, Psychotherapie und Diagnostik an der TU Braunschweig der gesetzlichen Verschwiegenheitsverpflichtung.

**Vielen Dank für Ihre Teilnahme!**

# Fragebogen zur Beanspruchung von Zahnärzten im Berufsalltag (FBZB)

Nora Buhrow, Jutta Margraf-Stiksrud & Nina Heinrichs

## Angaben zu Person

Geschlecht: ☐ weiblich ☐ männlich

Alter: \_\_\_\_ Jahre

## Angaben zur Praxis

1. Form des Arbeitsverhältnisses: ☐ Angestelltenverhältnis ☐ Niederlassung allein ☐ Praxisgemeinschaft

1a. Falls Praxisgemeinschaft, Anzahl der ärztlichen Kollegen: \_\_\_\_ Kollege/n

2. Ort der Niederlassung (Bundesland): \_\_\_\_\_

## Angaben zu Ihrer Tätigkeit

2. Durchschnittliche Arbeitszeit pro Woche:

\_\_\_\_ Std. am Stuhl, \_\_\_\_ Std. für Verwaltung, \_\_\_\_ Std. für Fortbildung, \_\_\_\_ Std. für sonstige Tätigkeiten

3. Tätig in der jetzigen Praxis seit: \_\_\_\_ Jahren

4. Anteil (in %) an erwachsenen Patienten bzw. Kindern und Jugendlichen in Ihrer Praxis:

Erwachsene \_\_\_\_ %      Kinder/Jugendliche (0-18 Jahre) \_\_\_\_ %

5. Eine (lokale) Anästhesie wird standardmäßig angeboten: ☐ ja ☐ nein

6. Verglichen mit anderen Berufen, schätzen Sie den Zahnarztberuf als mehr, weniger oder gleich stressig ein?

☐ Weniger stressig      ☐ Gleich stressig      ☐ Stressiger

Bitte senden Sie den ausgefüllten Fragebogen an:

M.Sc. Nora Buhrow, TU Braunschweig, Humboldtstr. 33, 38106 Braunschweig  
Oder per Fax: 0531-391 8105

© N. Buhrow, J. Margraf-Stiksrud & N. Heinrichs  
Fragebogen nur mit Genehmigung der Autoren nutzbar

Bitte beantworten Sie die Fragen im Hinblick auf Ihre letzten **4 Arbeitswochen**.

|                                                                          | 9. Kommen folgende Situationen in Ihrem Praxisalltag vor? |                       |                       |                       |                       | 10. Unabhängig von der Häufigkeit des Vorkommens, wie beanspruchend sind diese Situationen für Sie? |                       |                       |                       |                       |
|--------------------------------------------------------------------------|-----------------------------------------------------------|-----------------------|-----------------------|-----------------------|-----------------------|-----------------------------------------------------------------------------------------------------|-----------------------|-----------------------|-----------------------|-----------------------|
|                                                                          | Sehr selten                                               |                       |                       |                       |                       | Sehr häufig                                                                                         |                       |                       |                       |                       |
|                                                                          |                                                           |                       |                       |                       |                       | Überhaupt nicht beanspruchend                                                                       |                       |                       |                       |                       |
|                                                                          |                                                           |                       |                       |                       |                       | Sehr stark beanspruchend                                                                            |                       |                       |                       |                       |
| Zeitplan wird nicht eingehalten                                          | <input type="radio"/>                                     | <input type="radio"/> | <input type="radio"/> | <input type="radio"/> | <input type="radio"/> | <input type="radio"/>                                                                               | <input type="radio"/> | <input type="radio"/> | <input type="radio"/> | <input type="radio"/> |
| Verursachen von Schmerzen beim Patienten                                 | <input type="radio"/>                                     | <input type="radio"/> | <input type="radio"/> | <input type="radio"/> | <input type="radio"/> | <input type="radio"/>                                                                               | <input type="radio"/> | <input type="radio"/> | <input type="radio"/> | <input type="radio"/> |
| Sehr hohes Arbeitspensum                                                 | <input type="radio"/>                                     | <input type="radio"/> | <input type="radio"/> | <input type="radio"/> | <input type="radio"/> | <input type="radio"/>                                                                               | <input type="radio"/> | <input type="radio"/> | <input type="radio"/> | <input type="radio"/> |
| Behandlung von Angstpatienten                                            | <input type="radio"/>                                     | <input type="radio"/> | <input type="radio"/> | <input type="radio"/> | <input type="radio"/> | <input type="radio"/>                                                                               | <input type="radio"/> | <input type="radio"/> | <input type="radio"/> | <input type="radio"/> |
| Finanzieller Druck                                                       | <input type="radio"/>                                     | <input type="radio"/> | <input type="radio"/> | <input type="radio"/> | <input type="radio"/> | <input type="radio"/>                                                                               | <input type="radio"/> | <input type="radio"/> | <input type="radio"/> | <input type="radio"/> |
| Mangelhafte Assistenz von Angestellten                                   | <input type="radio"/>                                     | <input type="radio"/> | <input type="radio"/> | <input type="radio"/> | <input type="radio"/> | <input type="radio"/>                                                                               | <input type="radio"/> | <input type="radio"/> | <input type="radio"/> | <input type="radio"/> |
| Kurzfristig abgesagte Termine                                            | <input type="radio"/>                                     | <input type="radio"/> | <input type="radio"/> | <input type="radio"/> | <input type="radio"/> | <input type="radio"/>                                                                               | <input type="radio"/> | <input type="radio"/> | <input type="radio"/> | <input type="radio"/> |
| Behandlung von Kindern und Jugendlichen                                  | <input type="radio"/>                                     | <input type="radio"/> | <input type="radio"/> | <input type="radio"/> | <input type="radio"/> | <input type="radio"/>                                                                               | <input type="radio"/> | <input type="radio"/> | <input type="radio"/> | <input type="radio"/> |
| Berufsfremde Anforderungen (z.B. Bürokratie)                             | <input type="radio"/>                                     | <input type="radio"/> | <input type="radio"/> | <input type="radio"/> | <input type="radio"/> | <input type="radio"/>                                                                               | <input type="radio"/> | <input type="radio"/> | <input type="radio"/> | <input type="radio"/> |
| Konkurrenz zwischen Kollegen                                             | <input type="radio"/>                                     | <input type="radio"/> | <input type="radio"/> | <input type="radio"/> | <input type="radio"/> | <input type="radio"/>                                                                               | <input type="radio"/> | <input type="radio"/> | <input type="radio"/> | <input type="radio"/> |
| Eingeschränkte Behandlungsfreiheit durch Vertragsrechte und Kostenträger | <input type="radio"/>                                     | <input type="radio"/> | <input type="radio"/> | <input type="radio"/> | <input type="radio"/> | <input type="radio"/>                                                                               | <input type="radio"/> | <input type="radio"/> | <input type="radio"/> | <input type="radio"/> |
| Mangelnde Kooperation des Patienten                                      | <input type="radio"/>                                     | <input type="radio"/> | <input type="radio"/> | <input type="radio"/> | <input type="radio"/> | <input type="radio"/>                                                                               | <input type="radio"/> | <input type="radio"/> | <input type="radio"/> | <input type="radio"/> |

Bitte beantworten Sie die Fragen im Hinblick auf Ihre letzten 4 Arbeitswochen.

|                                                | 11. Kommt es vor, dass Sie folgende Anzeichen aufgrund der Beanspruchung in Ihrem Praxisalltag erleben? |                       |                       |                       |                       | 12. Unabhängig von der Häufigkeit des Vorkommens, wie belastend sind diese Anzeichen für Sie? |                       |                       |                       |                       |                       |                       |                       |                       |                       |
|------------------------------------------------|---------------------------------------------------------------------------------------------------------|-----------------------|-----------------------|-----------------------|-----------------------|-----------------------------------------------------------------------------------------------|-----------------------|-----------------------|-----------------------|-----------------------|-----------------------|-----------------------|-----------------------|-----------------------|-----------------------|
|                                                | Sehr selten                                                                                             |                       |                       |                       |                       | Sehr häufig                                                                                   |                       |                       |                       |                       |                       |                       |                       |                       |                       |
|                                                |                                                                                                         |                       |                       |                       |                       | Überhaupt nicht belastend                                                                     |                       |                       |                       |                       | Sehr stark belastend  |                       |                       |                       |                       |
| Meine Leistungsfähigkeit lässt nach            | <input type="radio"/>                                                                                   | <input type="radio"/> | <input type="radio"/> | <input type="radio"/> | <input type="radio"/> | <input type="radio"/>                                                                         | <input type="radio"/> | <input type="radio"/> | <input type="radio"/> | <input type="radio"/> | <input type="radio"/> | <input type="radio"/> | <input type="radio"/> | <input type="radio"/> | <input type="radio"/> |
| Ich habe Verspannungen/Schmerzen               | <input type="radio"/>                                                                                   | <input type="radio"/> | <input type="radio"/> | <input type="radio"/> | <input type="radio"/> | <input type="radio"/>                                                                         | <input type="radio"/> | <input type="radio"/> | <input type="radio"/> | <input type="radio"/> | <input type="radio"/> | <input type="radio"/> | <input type="radio"/> | <input type="radio"/> | <input type="radio"/> |
| Ich fühle mich gereizt/nervös                  | <input type="radio"/>                                                                                   | <input type="radio"/> | <input type="radio"/> | <input type="radio"/> | <input type="radio"/> | <input type="radio"/>                                                                         | <input type="radio"/> | <input type="radio"/> | <input type="radio"/> | <input type="radio"/> | <input type="radio"/> | <input type="radio"/> | <input type="radio"/> | <input type="radio"/> | <input type="radio"/> |
| Ich fühle mich schwach                         | <input type="radio"/>                                                                                   | <input type="radio"/> | <input type="radio"/> | <input type="radio"/> | <input type="radio"/> | <input type="radio"/>                                                                         | <input type="radio"/> | <input type="radio"/> | <input type="radio"/> | <input type="radio"/> | <input type="radio"/> | <input type="radio"/> | <input type="radio"/> | <input type="radio"/> | <input type="radio"/> |
| Ich habe Schwierigkeiten mich zu konzentrieren | <input type="radio"/>                                                                                   | <input type="radio"/> | <input type="radio"/> | <input type="radio"/> | <input type="radio"/> | <input type="radio"/>                                                                         | <input type="radio"/> | <input type="radio"/> | <input type="radio"/> | <input type="radio"/> | <input type="radio"/> | <input type="radio"/> | <input type="radio"/> | <input type="radio"/> | <input type="radio"/> |
| Ich habe Schweißausbrüche                      | <input type="radio"/>                                                                                   | <input type="radio"/> | <input type="radio"/> | <input type="radio"/> | <input type="radio"/> | <input type="radio"/>                                                                         | <input type="radio"/> | <input type="radio"/> | <input type="radio"/> | <input type="radio"/> | <input type="radio"/> | <input type="radio"/> | <input type="radio"/> | <input type="radio"/> | <input type="radio"/> |
| Ich habe Schlafstörungen                       | <input type="radio"/>                                                                                   | <input type="radio"/> | <input type="radio"/> | <input type="radio"/> | <input type="radio"/> | <input type="radio"/>                                                                         | <input type="radio"/> | <input type="radio"/> | <input type="radio"/> | <input type="radio"/> | <input type="radio"/> | <input type="radio"/> | <input type="radio"/> | <input type="radio"/> | <input type="radio"/> |
| Ich habe Magen-Darm-Probleme                   | <input type="radio"/>                                                                                   | <input type="radio"/> | <input type="radio"/> | <input type="radio"/> | <input type="radio"/> | <input type="radio"/>                                                                         | <input type="radio"/> | <input type="radio"/> | <input type="radio"/> | <input type="radio"/> | <input type="radio"/> | <input type="radio"/> | <input type="radio"/> | <input type="radio"/> | <input type="radio"/> |
| Ich bin müde                                   | <input type="radio"/>                                                                                   | <input type="radio"/> | <input type="radio"/> | <input type="radio"/> | <input type="radio"/> | <input type="radio"/>                                                                         | <input type="radio"/> | <input type="radio"/> | <input type="radio"/> | <input type="radio"/> | <input type="radio"/> | <input type="radio"/> | <input type="radio"/> | <input type="radio"/> | <input type="radio"/> |

Bitte beantworten Sie die Fragen im Hinblick auf Ihre letzten 4 Arbeitswochen.

|                      | 13. Kommt es vor, dass ängstliche Patienten folgende Gefühle bei Ihnen verursachen? |                       |                       |                       |                       | 14. Unabhängig von der Häufigkeit des Vorkommens, wie belastend sind diese Gefühle für Sie? |                       |                       |                       |                       |
|----------------------|-------------------------------------------------------------------------------------|-----------------------|-----------------------|-----------------------|-----------------------|---------------------------------------------------------------------------------------------|-----------------------|-----------------------|-----------------------|-----------------------|
|                      | Sehr selten                                                                         |                       |                       |                       |                       | Sehr häufig                                                                                 |                       |                       |                       |                       |
|                      |                                                                                     |                       |                       |                       |                       | Überhaupt nicht belastend                                                                   |                       |                       |                       |                       |
|                      |                                                                                     |                       |                       |                       |                       | Sehr stark belastend                                                                        |                       |                       |                       |                       |
| Trauer               | <input type="radio"/>                                                               | <input type="radio"/> | <input type="radio"/> | <input type="radio"/> | <input type="radio"/> | <input type="radio"/>                                                                       | <input type="radio"/> | <input type="radio"/> | <input type="radio"/> | <input type="radio"/> |
| Stolz                | <input type="radio"/>                                                               | <input type="radio"/> | <input type="radio"/> | <input type="radio"/> | <input type="radio"/> | <input type="radio"/>                                                                       | <input type="radio"/> | <input type="radio"/> | <input type="radio"/> | <input type="radio"/> |
| Abneigung            | <input type="radio"/>                                                               | <input type="radio"/> | <input type="radio"/> | <input type="radio"/> | <input type="radio"/> | <input type="radio"/>                                                                       | <input type="radio"/> | <input type="radio"/> | <input type="radio"/> | <input type="radio"/> |
| Niedergeschlagenheit | <input type="radio"/>                                                               | <input type="radio"/> | <input type="radio"/> | <input type="radio"/> | <input type="radio"/> | <input type="radio"/>                                                                       | <input type="radio"/> | <input type="radio"/> | <input type="radio"/> | <input type="radio"/> |
| Zuneigung            | <input type="radio"/>                                                               | <input type="radio"/> | <input type="radio"/> | <input type="radio"/> | <input type="radio"/> | <input type="radio"/>                                                                       | <input type="radio"/> | <input type="radio"/> | <input type="radio"/> | <input type="radio"/> |
| Freude               | <input type="radio"/>                                                               | <input type="radio"/> | <input type="radio"/> | <input type="radio"/> | <input type="radio"/> | <input type="radio"/>                                                                       | <input type="radio"/> | <input type="radio"/> | <input type="radio"/> | <input type="radio"/> |
| Scham                | <input type="radio"/>                                                               | <input type="radio"/> | <input type="radio"/> | <input type="radio"/> | <input type="radio"/> | <input type="radio"/>                                                                       | <input type="radio"/> | <input type="radio"/> | <input type="radio"/> | <input type="radio"/> |
| Angst                | <input type="radio"/>                                                               | <input type="radio"/> | <input type="radio"/> | <input type="radio"/> | <input type="radio"/> | <input type="radio"/>                                                                       | <input type="radio"/> | <input type="radio"/> | <input type="radio"/> | <input type="radio"/> |
| Interesse            | <input type="radio"/>                                                               | <input type="radio"/> | <input type="radio"/> | <input type="radio"/> | <input type="radio"/> | <input type="radio"/>                                                                       | <input type="radio"/> | <input type="radio"/> | <input type="radio"/> | <input type="radio"/> |
| Hilflosigkeit        | <input type="radio"/>                                                               | <input type="radio"/> | <input type="radio"/> | <input type="radio"/> | <input type="radio"/> | <input type="radio"/>                                                                       | <input type="radio"/> | <input type="radio"/> | <input type="radio"/> | <input type="radio"/> |
| Sympathie            | <input type="radio"/>                                                               | <input type="radio"/> | <input type="radio"/> | <input type="radio"/> | <input type="radio"/> | <input type="radio"/>                                                                       | <input type="radio"/> | <input type="radio"/> | <input type="radio"/> | <input type="radio"/> |
| Unsicherheit         | <input type="radio"/>                                                               | <input type="radio"/> | <input type="radio"/> | <input type="radio"/> | <input type="radio"/> | <input type="radio"/>                                                                       | <input type="radio"/> | <input type="radio"/> | <input type="radio"/> | <input type="radio"/> |
| Ärger                | <input type="radio"/>                                                               | <input type="radio"/> | <input type="radio"/> | <input type="radio"/> | <input type="radio"/> | <input type="radio"/>                                                                       | <input type="radio"/> | <input type="radio"/> | <input type="radio"/> | <input type="radio"/> |

Bitte beantworten Sie die Fragen im Hinblick auf Ihre letzten **4 Arbeitswochen**.

|                                                                                                   | 15. Wenden Sie folgende Strategien im Umgang mit ängstlichen Patienten an? |                       |                       |                       |                       | 16. Unabhängig von der Häufigkeit des Vorkommens, wie belastend ist die Anwendung dieser Strategien für Sie? |                       |                       |                       |                       |
|---------------------------------------------------------------------------------------------------|----------------------------------------------------------------------------|-----------------------|-----------------------|-----------------------|-----------------------|--------------------------------------------------------------------------------------------------------------|-----------------------|-----------------------|-----------------------|-----------------------|
|                                                                                                   | Sehr selten                                                                |                       | Sehr häufig           |                       |                       | Überhaupt nicht belastend                                                                                    |                       | Sehr stark belastend  |                       |                       |
| Ich bitte die Begleitperson während der Behandlung im Wartezimmer zu bleiben                      | <input type="radio"/>                                                      | <input type="radio"/> | <input type="radio"/> | <input type="radio"/> | <input type="radio"/> | <input type="radio"/>                                                                                        | <input type="radio"/> | <input type="radio"/> | <input type="radio"/> | <input type="radio"/> |
| Ich drohe dem Patienten mit Konsequenzen                                                          | <input type="radio"/>                                                      | <input type="radio"/> | <input type="radio"/> | <input type="radio"/> | <input type="radio"/> | <input type="radio"/>                                                                                        | <input type="radio"/> | <input type="radio"/> | <input type="radio"/> | <input type="radio"/> |
| Ich Sorge dafür, dass ich durch zusätzliche Assistenz vom Personal stärkere Unterstützung erhalte | <input type="radio"/>                                                      | <input type="radio"/> | <input type="radio"/> | <input type="radio"/> | <input type="radio"/> | <input type="radio"/>                                                                                        | <input type="radio"/> | <input type="radio"/> | <input type="radio"/> | <input type="radio"/> |
| Ich zeige dem Patienten offen, dass ich mich gestresst fühle                                      | <input type="radio"/>                                                      | <input type="radio"/> | <input type="radio"/> | <input type="radio"/> | <input type="radio"/> | <input type="radio"/>                                                                                        | <input type="radio"/> | <input type="radio"/> | <input type="radio"/> | <input type="radio"/> |
| Ich rede beruhigend auf den Patienten ein                                                         | <input type="radio"/>                                                      | <input type="radio"/> | <input type="radio"/> | <input type="radio"/> | <input type="radio"/> | <input type="radio"/>                                                                                        | <input type="radio"/> | <input type="radio"/> | <input type="radio"/> | <input type="radio"/> |
| Ich lehne die Behandlung des Patienten ab                                                         | <input type="radio"/>                                                      | <input type="radio"/> | <input type="radio"/> | <input type="radio"/> | <input type="radio"/> | <input type="radio"/>                                                                                        | <input type="radio"/> | <input type="radio"/> | <input type="radio"/> | <input type="radio"/> |
| Ich plane zusätzliche Zeit für die Behandlung ein                                                 | <input type="radio"/>                                                      | <input type="radio"/> | <input type="radio"/> | <input type="radio"/> | <input type="radio"/> | <input type="radio"/>                                                                                        | <input type="radio"/> | <input type="radio"/> | <input type="radio"/> | <input type="radio"/> |
| Ich nehme Medikamente (z.B. Beruhigungs- oder Schlafmittel) gegen Belastungssymptome ein          | <input type="radio"/>                                                      | <input type="radio"/> | <input type="radio"/> | <input type="radio"/> | <input type="radio"/> | <input type="radio"/>                                                                                        | <input type="radio"/> | <input type="radio"/> | <input type="radio"/> | <input type="radio"/> |
| Ich versuche die Behandlung mit dem Patienten gemeinsam durchzustehen                             | <input type="radio"/>                                                      | <input type="radio"/> | <input type="radio"/> | <input type="radio"/> | <input type="radio"/> | <input type="radio"/>                                                                                        | <input type="radio"/> | <input type="radio"/> | <input type="radio"/> | <input type="radio"/> |
| Die entstandene Belastung kann ich durch ein Glas Wein oder Bier am Abend reduzieren              | <input type="radio"/>                                                      | <input type="radio"/> | <input type="radio"/> | <input type="radio"/> | <input type="radio"/> | <input type="radio"/>                                                                                        | <input type="radio"/> | <input type="radio"/> | <input type="radio"/> | <input type="radio"/> |

Bitte senden Sie den ausgefüllten Fragebogen an:

M.Sc. Nora Buhrow, TU Braunschweig, Humboldtstr. 33, 38106 Braunschweig  
Oder per Fax: 0531-391 8105

© N. Buhrow, J. Margraf-Stiksrud & N. Heinrichs  
Fragebogen nur mit Genehmigung der Autoren nutzbar
