# Supplementary material
Source: publisher figshare collection journal article supplement (https://karger.figshare.com/articles/dataset/_/6269690)
Supplement: Supplementary file 2 [file 1]

**Online Suppl. Tab. 1.** Ergänzung der demographischen Variablen der ersten (N= 201) und zweiten (N = 64) Stichprobe

|                                                                         | 1. Stichprobe | 2. Stichprobe |
|-------------------------------------------------------------------------|---------------|---------------|
| <i>Aufgabenverteilung in Arbeitsstunden pro Woche</i>                   | <i>M (SD)</i> | <i>M (SD)</i> |
| Arbeit am Stuhl                                                         | 33,99 (7,56)  | 34,84 (3,91)  |
| Verwaltungsaufgaben                                                     | 8,02 (6,64)   | 6,25 (4,81)   |
| Fortbildungen                                                           | 2,24 (2,42)   | 2,30 (2,09)   |
| Sonstige Tätigkeiten                                                    | 2,25 (2,40)   | 2,13 (2,37)   |
| <i>Prozentualer Anteil verschiedener Patientengruppen in der Praxis</i> | <i>M (SD)</i> | <i>M (SD)</i> |
| Erwachsene                                                              | 77,00 (19,62) | 78,41 (16,00) |
| Kinder und Jugendliche                                                  | 21,45 (17,41) | 19,90 (12,82) |

**Online Suppl. Tab. 2.** Faktorladungen, Eigenwerte und Kommunalitäten der Hauptkomponentenanalyse für den zweiten Inhaltsbereich (Allgemeine Beanspruchung)

|                                                 | <i>Häufigkeitsskala</i> |                |                 |                | <i>Beanspruchungsskala</i> |                |                 |                |
|-------------------------------------------------|-------------------------|----------------|-----------------|----------------|----------------------------|----------------|-----------------|----------------|
|                                                 | 1. Stichprobe           |                | 2. Stichprobe   |                | 1. Stichprobe              |                | 2. Stichprobe   |                |
|                                                 | Faktorladungen          | Kommunalitäten | Faktorladungen  | Kommunalitäten | Faktorladungen             | Kommunalitäten | Faktorladungen  | Kommunalitäten |
|                                                 | <i>Faktor I</i>         |                | <i>Faktor I</i> |                | <i>Faktor I</i>            |                | <i>Faktor I</i> |                |
| Ich fühle mich schwach                          | 0,78                    | 0,60           | 0,87            | 0,75           | 0,80                       | 0,64           | 0,81            | 0,66           |
| Ich fühle mich gereizt/nervös                   | 0,75                    | 0,56           | 0,64            | 0,41           | 0,73                       | 0,54           | 0,46            | 0,46           |
| Ich bin müde                                    | 0,72                    | 0,52           | 0,80            | 0,65           | 0,76                       | 0,57           | 0,81            | 0,66           |
| Ich habe Schwierigkeiten, mich zu konzentrieren | 0,70                    | 0,48           | 0,75            | 0,56           | 0,75                       | 0,57           | 0,81            | 0,66           |
| Ich habe Schlafstörungen                        | 0,66                    | 0,43           | 0,66            | 0,44           | 0,75                       | 0,56           | 0,77            | 0,59           |
| Meine Leistungsfähigkeit lässt nach             | 0,63                    | 0,40           | 0,71            | 0,50           | 0,69                       | 0,48           | 0,74            | 0,54           |
| Ich habe Schweißausbrüche                       | 0,57                    | 0,32           | 0,51            | 0,26           | 0,73                       | 0,53           | 0,70            | 0,49           |
| Ich habe Magen-Darm-Probleme                    | 0,56                    | 0,32           | 0,69            | 0,48           | 0,70                       | 0,49           | 0,69            | 0,48           |
| Ich habe Verspannungen/Schmerzen                | 0,53                    | 0,28           | 0,61            | 0,37           | 0,55                       | 0,30           | 0,62            | 0,39           |
| Ich habe Angst vor (ängstlichen) Patienten      | 0,44                    | 0,19           | -a              | -a             | 0,39                       | 0,15           | -a              | -a             |
| Eigenwerte                                      | 4,10                    |                | 4,42            |                | 4,83                       |                | 4,93            |                |

Anmerkung. Extraktionsmethode: Hauptkomponentenanalyse. a = Item in der Fragebogenversion nicht enthalten.

**Online Suppl. Tab. 3.** Faktorladungen, Eigenwerte und Kommunalitäten der Hauptkomponentenanalyse für den dritten Inhaltsbereich (Affektive Reaktionen auf ängstliche Patienten).

|                      | <i>Häufigkeitsskala</i> |           |           |               |           |       | <i>Beanspruchungsskala</i> |           |        |               |           |        |
|----------------------|-------------------------|-----------|-----------|---------------|-----------|-------|----------------------------|-----------|--------|---------------|-----------|--------|
|                      | 1. Stichprobe           |           |           | 2. Stichprobe |           |       | 1. Stichprobe              |           |        | 2. Stichprobe |           |        |
|                      | Faktorla-               |           | Kommu-    | Faktorla-     |           | Kom-  | Faktorla-                  |           | Kom-   | Faktorla-     |           | Kom-   |
|                      | dungen                  |           | nalitäten | dungen        |           | muna- | dungen                     |           | munal- | dungen        |           | munal- |
|                      | <i>Faktor</i>           |           |           | <i>Faktor</i> |           |       | <i>Faktor</i>              |           |        | <i>Faktor</i> |           |        |
|                      | <i>I</i>                | <i>II</i> |           | <i>I</i>      | <i>II</i> |       | <i>I</i>                   | <i>II</i> |        | <i>I</i>      | <i>II</i> |        |
| Trauer               | 0,35                    | 0,63      | 0,52      | 0,45          | 0,23      | 0,26  | 0,75                       | 0,01      | 0,57   | 0,72          | 0,14      | 0,54   |
| Ärger                | 0,75                    | -0,11     | 0,57      | 0,65          | -0,15     | 0,45  | 0,74                       | -0,02     | 0,54   | 0,81          | 0,16      | 0,69   |
| Abneigung            | 0,71                    | -0,16     | 0,53      | 0,48          | -0,35     | 0,36  | 0,74                       | 0,04      | 0,54   | 0,84          | 0,05      | 0,71   |
| Niedergeschlagenheit | 0,74                    | 0,06      | 0,54      | 0,79          | 0,10      | 0,63  | 0,84                       | 0,08      | 0,71   | 0,84          | 0,17      | 0,74   |
| Scham                | 0,37                    | 0,58      | 0,48      | 0,56          | 0,45      | 0,52  | 0,73                       | 0,16      | 0,56   | 0,84          | 0,04      | 0,71   |
| Angst                | 0,74                    | 0,28      | 0,63      | 0,67          | -0,05     | 0,45  | 0,86                       | 0,11      | 0,75   | 0,80          | 0,23      | 0,70   |
| Unsicherheit         | 0,73                    | 0,27      | 0,61      | 0,77          | -0,08     | 0,61  | 0,87                       | 0,09      | 0,76   | 0,87          | 0,09      | 0,76   |
| Hilflosigkeit        | 0,75                    | 0,17      | 0,59      | 0,74          | -0,13     | 0,56  | 0,85                       | 0,07      | 0,73   | 0,85          | 0,06      | 0,72   |
| Zuneigung            | -0,13                   | 0,72      | 0,54      | -0,10         | 0,80      | 0,65  | 0,08                       | 0,87      | 0,76   | 0,21          | 0,71      | 0,56   |
| Freude               | -0,07                   | 0,65      | 0,43      | 0,12          | 0,85      | 0,74  | 0,05                       | 0,86      | 0,76   | 0,13          | 0,83      | 0,71   |
| Stolz                | -a                      | -a        | -a        | 0,15          | 0,66      | 0,45  | -a                         | -a        | -a     | 0,32          | 0,73      | 0,63   |
| Interesse            | -a                      | -a        | -a        | -0,21         | 0,79      | 0,67  | -a                         | -a        | -a     | 0,08          | 0,69      | 0,48   |
| Sympathie            | -a                      | -a        | -a        | -0,17         | 0,80      | 0,66  | -a                         | -a        | -a     | -0,13         | 0,69      | 0,49   |
| Eigenwerte           | 3,78                    | 1,66      |           | 3,71          | 3,30      |       | 5,20                       | 1,48      |        | 6,06          | 2,37      |        |

Anmerkung. Extraktionsmethode: Hauptkomponentenanalyse. a = Item in der Fragebogenversion nicht enthalten.

**Online Suppl. Tab. 4.** Faktorladungen, Eigenwerte und Kommunalitäten der Hauptkomponentenanalyse für den vierten Inhaltsbereich (Strategien im Umgang mit ängstlichen Patienten).

|                                                                                                   | <i>Häufigkeitsskala</i> |               |         |               |               |         | <i>Beanspruchungsskala</i> |               |         |               |               |         |
|---------------------------------------------------------------------------------------------------|-------------------------|---------------|---------|---------------|---------------|---------|----------------------------|---------------|---------|---------------|---------------|---------|
|                                                                                                   | 1. Stichprobe           |               |         | 2. Stichprobe |               |         | 1. Stichprobe              |               |         | 2. Stichprobe |               |         |
|                                                                                                   | Faktorla-               | Kom-          | litäten | Faktorla-     | Kom-          | litäten | Faktorla-                  | Kom-          | litäten | Faktorla-     | Kom-          | litäten |
|                                                                                                   | dungen                  | muna-         |         | dungen        | muna-         |         | dungen                     | muna-         |         | dungen        | muna-         |         |
|                                                                                                   | <i>Faktor</i>           | <i>Faktor</i> |         | <i>Faktor</i> | <i>Faktor</i> |         | <i>Faktor</i>              | <i>Faktor</i> |         | <i>Faktor</i> | <i>Faktor</i> |         |
|                                                                                                   | <i>I</i>                | <i>II</i>     |         | <i>I</i>      | <i>II</i>     |         | <i>I</i>                   | <i>II</i>     |         | <i>I</i>      | <i>II</i>     |         |
| Ich rede beruhigend auf den Patienten ein                                                         | -0,12                   | 0,64          | 0,43    | -0,28         | 0,74          | 0,63    | 0,76                       | -0,08         | 0,59    | 0,06          | 0,91          | 0,83    |
| Ich kläre den Patienten ausführlicher über das Vorgehen auf als nicht ängstliche Patienten        | -0,14                   | 0,20          | 0,06    | -.a           | -.a           | -.a     | 0,72                       | 0,01          | 0,52    | -.a           | -.a           | -.a     |
| Ich plane zusätzliche Zeit für die Behandlung ein                                                 | -0,08                   | 0,64          | 0,42    | 0,03          | 0,47          | 0,22    | 0,76                       | 0,06          | 0,58    | 0,20          | 0,72          | 0,56    |
| Ich versuche die Behandlung mit dem Patienten gemeinsam durchzustehen                             | 0,26                    | 0,33          | 0,17    | 0,17          | 0,47          | 0,26    | 0,50                       | 0,29          | 0,33    | 0,25          | 0,74          | 0,61    |
| Ich Sorge dafür, dass ich durch zusätzliche Assistenz vom Personal stärkere Unterstützung erhalte | 0,27                    | 0,57          | 0,39    | 0,52          | 0,30          | 0,36    | 0,49                       | 0,13          | 0,26    | 0,34          | 0,53          | 0,39    |
| Ich bitte die Begleitperson während der Behandlung im Wartezimmer zu bleiben                      | 0,25                    | 0,46          | 0,28    | 0,39          | 0,40          | 0,32    | 0,47                       | 0,26          | 0,29    | 0,67          | 0,23          | 0,50    |
| Ich versuche die Angst des Patienten zu ignorieren und die Behandlung zügig durchzuführen         | 0,41                    | 0,06          | 0,17    | -.a           | -.a           | -.a     | 0,64                       | 0,41          | 0,57    | -.a           | -.a           | -.a     |
| Die entstandene Belastung kann ich durch ein Glas Wein oder Bier am Abend reduzieren              | 0,26                    | -0,41         | 0,23    | 0,14          | -0,64         | 0,43    | -0,06                      | 0,76          | 0,58    | 0,79          | 0,17          | 0,65    |

|                                                                                          |      |       |      |      |       |      |       |      |      |      |      |      |
|------------------------------------------------------------------------------------------|------|-------|------|------|-------|------|-------|------|------|------|------|------|
| Ich drohe dem Patienten mit Konsequenzen                                                 | 0,60 | -0,45 | 0,34 | 0,67 | 0,18  | 0,49 | 0,30  | 0,71 | 0,60 | 0,80 | 0,33 | 0,75 |
| Ich zeige dem Patienten offen, dass ich mich gestresst fühle                             | 0,68 | 0,05  | 0,46 | 0,79 | -0,22 | 0,67 | 0,39  | 0,53 | 0,43 | 0,75 | 0,24 | 0,61 |
| Ich lehne die Behandlung des Patienten ab                                                | 0,70 | -0,05 | 0,49 | 0,73 | -0,21 | 0,58 | 0,33  | 0,57 | 0,44 | 0,67 | 0,29 | 0,53 |
| Ich nehme Medikamente (z.B. Beruhigungs- oder Schlafmittel) gegen Belastungssymptome ein | 0,44 | -0,06 | 0,20 | 0,42 | -0,04 | 0,17 | -0,09 | 0,85 | 0,72 | 0,85 | 0,03 | 0,71 |
| Eigenwerte                                                                               | 1,98 | 1,68  |      | 2,35 | 1,77  |      | 4,04  | 1,87 |      | 4,68 | 1,47 |      |

Anmerkung. Extraktionsmethode: Hauptkomponentenanalyse. a = Item in der Fragebogenversion nicht enthalten.
